# Supplementary material
Source: publisher figshare collection journal article supplement (https://tandf.figshare.com/ndownloader/files/18726074)
Supplement: Supplementary file 1 [file 18726074]

## Sheet: Appendix 1
Appendix 1. Estimates of the prevalence and number of patients with self-reported rheumatoid arthritis among Japanese age ≧ 16, by sex, age, by using the data of Comprehensive Survey of Living Conditions, Japan, 2016.
Age		Male														Female
		Observed number of RA patients	Total sample		Prevalence							Population n/1000		Estimated number of RA patients n/1000		Observed number of RA patients	Total sample		Prevalence							Population n/1000		Estimated number of RA patients n/1000
		A	B		A/B	(	95% CI			)		C		A/B×C		A	B		A/B	(	95% CI			)		C		A/B×C
16-29		2	29015		6.89299e-05	(	0	-	0.0003	)		8930		0.615544		19	28868		0.000658168	(	0	-	0.001	)		8478		5.57995
30-34		4	12485		0.000320384	(	0	-	0.001	)		3686		1.18094		16	12953		0.00123524	(	0.001	-	0.002	)		3572		4.41226
35-39		14	15299		0.000915092	(	0.001	-	0.002	)		4117		3.76744		42	15752		0.00266633	(	0.002	-	0.004	)		4002		10.6706
40-44		15	19240		0.000779626	(	0	-	0.001	)		4922		3.83732		67	19539		0.00342904	(	0.003	-	0.004	)		4792		16.432
45-49		36	18890		0.00190577	(	0.001	-	0.003	)		4686		8.93044		116	19837		0.00584766	(	0.005	-	0.007	)		4597		26.8817
50-54		36	16832		0.00213878	(	0.001	-	0.003	)		3968		8.48669		151	17741		0.00851136	(	0.007	-	0.01	)		3935		33.4922
55-59		50	17197		0.00290748	(	0.002	-	0.004	)		3759		10.9292		252	18191		0.013853	(	0.012	-	0.016	)		3786		52.4475
60-64		110	18836		0.00583988	(	0.005	-	0.007	)		4019		23.4705		304	20126		0.0151048	(	0.013	-	0.017	)		4141		62.5491
65-69		165	24101		0.00684619	(	0.006	-	0.008	)		4972		34.0393		485	25812		0.0187897	(	0.017	-	0.021	)		5304		99.6606
70-74		135	16877		0.00799905	(	0.007	-	0.009	)		3451		27.6047		394	19153		0.0205712	(	0.019	-	0.023	)		3957		81.4002
75-79		151	14497		0.0104159	(	0.009	-	0.012	)		2905		30.2583		388	17235		0.0225123	(	0.02	-	0.025	)		3620		81.4946
80-85		137	10663		0.0128482	(	0.011	-	0.015	)		2096		26.9298		361	14552		0.0248076	(	0.022	-	0.027	)		3085		76.5314
86-89		66	6016		0.0109707	(	0.008	-	0.014	)		1120		12.2872		224	9761		0.0229485	(	0.02	-	0.026	)		2155		49.4539
90-		26	2417		0.0107571	(	0.007	-	0.016	)		455		4.8945		92	5731		0.016053	(	0.013	-	0.02	)		1472		23.6301
Total		947	222365									53086		197.232		2911	245251									56896		624.636

## Sheet: Appendix 2
Appendix 2. Conservative* estimates of the prevalence and number of patients with self-reported rheumatoid arthritis among Japanese age ≧ 16, by sex, age, by using the data of Comprehensive Survey of Living Conditions, Japan, 2016.
Age		Male														Female
		Observed number of RA patients	Total sample		Prevalence							Population n/1000		Estimated number of RA patients n/1000		Observed number of RA patients	Total sample		Prevalence							Population n/1000		Estimated number of RA patients n/1000
		A	B		A/B	(	95% CI			)		C		A/B×C		A	B		A/B	(	95% CI			)		C		A/B×C
16-29		2	30360		6.58762e-05	(	0	-	0.0002	)		8930		0.588274		19	30044		0.000632406	(	0	-	0.001	)		8478		5.36154
30-34		4	12951		0.000308856	(	0	-	0.001	)		3686		1.13844		16	13379		0.0011959	(	0.001	-	0.002	)		3572		4.27177
35-39		14	15831		0.000884341	(	0	-	0.001	)		4117		3.64083		42	16218		0.00258972	(	0.002	-	0.003	)		4002		10.364
40-44		15	19939		0.000752294	(	0	-	0.001	)		4922		3.70279		67	20146		0.00332572	(	0.003	-	0.004	)		4792		15.9369
45-49		36	19568		0.00183974	(	0.001	-	0.003	)		4686		8.62101		116	20480		0.00566406	(	0.005	-	0.007	)		4597		26.0377
50-54		36	17467		0.00206103	(	0.001	-	0.003	)		3968		8.17816		151	18341		0.00823292	(	0.007	-	0.01	)		3935		32.3965
55-59		50	17835		0.00280348	(	0.002	-	0.004	)		3759		10.5383		252	18821		0.0133893	(	0.012	-	0.015	)		3786		50.6919
60-64		110	19526		0.00563351	(	0.005	-	0.007	)		4019		22.6411		304	20857		0.0145754	(	0.013	-	0.016	)		4141		60.3569
65-69		165	25087		0.00657711	(	0.006	-	0.008	)		4972		32.7014		485	26877		0.0180452	(	0.016	-	0.02	)		5304		95.7116
70-74		135	17713		0.00762152	(	0.006	-	0.009	)		3451		26.3019		394	20118		0.0195845	(	0.018	-	0.022	)		3957		77.4957
75-79		151	15333		0.00984804	(	0.008	-	0.012	)		2905		28.6086		388	18344		0.0211513	(	0.019	-	0.023	)		3620		76.5678
80-85		137	11515		0.0118975	(	0.01	-	0.014	)		2096		24.9372		361	15678		0.0230259	(	0.021	-	0.025	)		3085		71.0349
86-89		66	6643		0.00993527	(	0.008	-	0.013	)		1120		11.1275		224	10859		0.0206281	(	0.018	-	0.023	)		2155		44.4534
90-		26	2783		0.00934244	(	0.006	-	0.014	)		455		4.25081		92	6840		0.0134503	(	0.011	-	0.016	)		1472		19.7988
Total		947	232551									53086		186.976		2911	257002									56896		590.479
*Available information of subjects who had been hospitalized or admitted to any facilities, or who failed to clarify their admission status was only age and sex. They were included in denominator to obtain conservative estimation.
